# Supplementary material for: Effects of Physical Activity Training in Patients with Alzheimer’s Dementia: Results of a Pilot RCT Study
Source: PubMed Central journal article supplement (PMC4401690; doi:10.1371/journal.pone.0121478), 2015-04-17

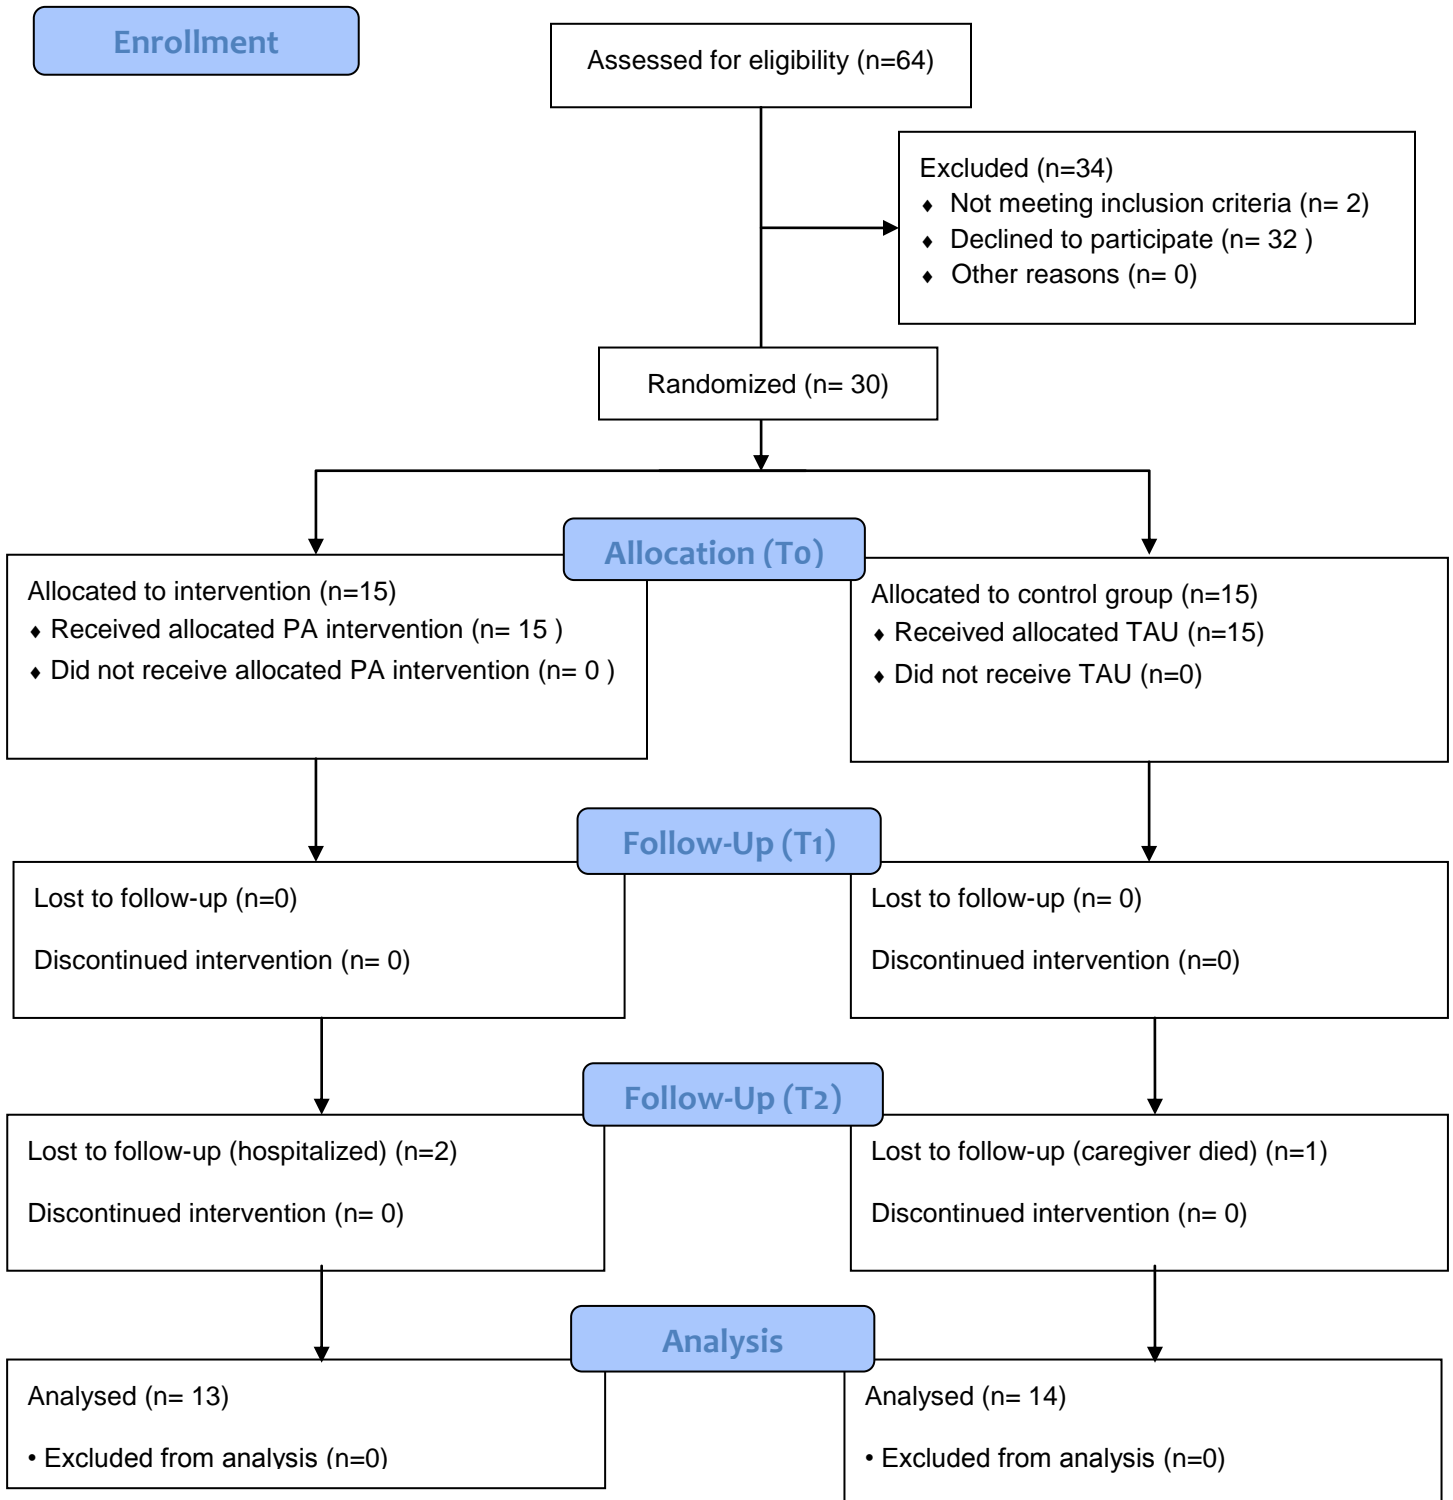

Supplement: pone.0121478.s002.pdf [file pone.0121478.s002.pdf]
